# Supplementary material for: Performance and Enhancement of Various Fillers Guiding Vanadium (V) Bioremediation
Source: MDPI journal article supplement (doi:10.3390/ijerph192214926), 2022-11-13
Supplement: s1 [file s1]

## Supporting Information

### Performance and Enhancement of Various Fillers Guiding

### Vanadium (V) Bioremediation

Liting Hao<sup>\*</sup>, Lin Li, Bangyan Wang, Xinli Wang, Jinkai Shi, Chen Shi, Xiaodi Hao<sup>\*</sup>

*Sino-Dutch R&D Centre for Future Wastewater Treatment Technologies/Key Laboratory of Urban Stormwater System and Water Environment, Beijing University of Civil Engineering and Architecture, Beijing 100044, China*

<sup>\*</sup>Corresponding author: Liting Hao; Xiaodi Hao

E-mail: haoliting@bucea.edu.cn; xdhao@hotmail.com

This supporting information contains:

number of pages: 5

number of tables: 2

number of figures: 1

**Table S1. (a) Information of main chemical reagents used in the study.**

| Laboratory reagents                                        | Manufacturer                                      |
|------------------------------------------------------------|---------------------------------------------------|
| Ethanol                                                    | Beijing Chemical Pharmaceutical Co., Ltd.         |
| Citric acid                                                | Shanghai Aladdin Biochemical Technology Co., Ltd. |
| 2-(5-bromo-2-pyridylazo)-5-diethylaminophenol (5-Br-PADAP) | Shanghai Aladdin Biochemical Technology Co., Ltd. |
| NaHCO <sub>3</sub>                                         | China National Pharmaceutical Group Corporation   |
| NaVO <sub>3</sub>                                          | Shanghai Aladdin Biochemical Technology Co., Ltd. |
| HNO <sub>3</sub>                                           | Beijing Chemical Pharmaceutical Co., Ltd.         |
| KH <sub>2</sub> PO <sub>4</sub>                            | China National Pharmaceutical Group Corporation   |
| H <sub>2</sub> SO <sub>4</sub>                             | Beijing Chemical Pharmaceutical Co., Ltd.         |
| NaCl                                                       | Beijing Chemical Pharmaceutical Co., Ltd.         |
| CaCl <sub>2</sub>                                          | China National Pharmaceutical Group Corporation   |
| NaOH                                                       | Beijing Chemical Reagent Factory                  |
| KCl                                                        | China National Pharmaceutical Group Corporation   |
| KBr                                                        | Shanghai Aladdin Biochemical Technology Co., Ltd. |
| Na <sub>2</sub> HPO <sub>4</sub>                           | Shanghai Aladdin Biochemical Technology Co., Ltd. |
| NH <sub>4</sub> Cl                                         | China National Pharmaceutical Group Corporation   |
| C <sub>6</sub> H <sub>12</sub> O <sub>6</sub>              | Shanghai Aladdin Biochemical Technology Co., Ltd. |
| MgCl <sub>2</sub> ·6H <sub>2</sub> O                       | China National Pharmaceutical Group Corporation   |

**(b) The main instruments used in the study.**

| Instrument                                                | Model                    | Manufacturer             |
|-----------------------------------------------------------|--------------------------|--------------------------|
| Spectrophotometer                                         | Cary 5000                | Agilent Technologies     |
| TOC analyzer                                              | vario TOC cube           | DKSH, Switzerland        |
| Three-dimensional fluorescence excitation emission matrix | Lumina                   | Thermo                   |
| Ultra-pure water machine                                  | arium comfort            | Wiggins                  |
| ICP-OES                                                   | ICAP7200                 | Thermo Fisher Scientific |
| Constant temperature incubator                            | Nicolet Is5              | Thermo Scientific        |
| Mixer                                                     | Magnetic Stirrer WH-610D | Wiggins                  |

**Table S2. Tests with operation conditions and performance results in this study and previous studies.**

| Materials                                               | Carbon source      | Microorganism                    | The initial V concentration | Time   | Removal Efficiency | Reference          |
|---------------------------------------------------------|--------------------|----------------------------------|-----------------------------|--------|--------------------|--------------------|
| N/A                                                     | Citrate (300 mg/L) | <i>Lactococcus raffinolactis</i> | 50 mg/L                     | 10 d   | 86.5±2.17%         | Zhang et al., 2021 |
| N/A                                                     | Citrate (6 mM)     | <i>Shewanella loihica</i> PV-4   | 50.6 mg/L                   | 27 d   | 71.3%              | Wang et al., 2017  |
| N/A                                                     | N/A                | anaerobic sludge                 | 10 mg/L                     | 165 d  | 99.2±0.6%          | Shi et al., 2020   |
| Hydroxyapatite (0.2 g)                                  | N/A                | N/A                              | 50 mg/L                     | 30 min | 85%                | Ali et al., 2021   |
| Amino modified municipal sludge derived ceramic (800 g) | N/A                | N/A                              | 50 mg/L                     | 8 h    | 99.9%              | He et al., 2018    |
| Maifanite-1 (10 g)                                      | staw (2.5 g)       | anaerobic sludge                 | 75 mg/L                     | 168 h  | >99.9%             | In this study      |
| Maifanite-1 (10 g)                                      | staw (2.5 g)       | N/A                              | 75 mg/L                     | 168 h  | 52.1%              | In this study      |
| Maifanite-2 (10 g)                                      | staw (2.5 g)       | anaerobic sludge                 | 75 mg/L                     | 168 h  | >99.9%             | In this study      |
| Maifanite-2 (10 g)                                      | staw (2.5 g)       | N/A                              | 75 mg/L                     | 168 h  | 60.5%              | In this study      |
| Black volcanics (10 g)                                  | staw (2.5 g)       | anaerobic sludge                 | 75 mg/L                     | 168 h  | >99.9%             | In this study      |
| Black volcanics (10 g)                                  | staw (2.5 g)       | N/A                              | 75 mg/L                     | 168 h  | 53.4%              | In this study      |
| Green zeolite (10 g)                                    | staw (2.5 g)       | N/A                              | 75 mg/L                     | 168 h  | 66.0%              | In this study      |
| Ceramsite (10 g)                                        | staw (2.5 g)       | N/A                              | 75 mg/L                     | 168 h  | 84.8%              | In this study      |
| N/A                                                     | staw (2.5 g)       | N/A                              | 75 mg/L                     | 168 h  | 52.4%              | In this study      |

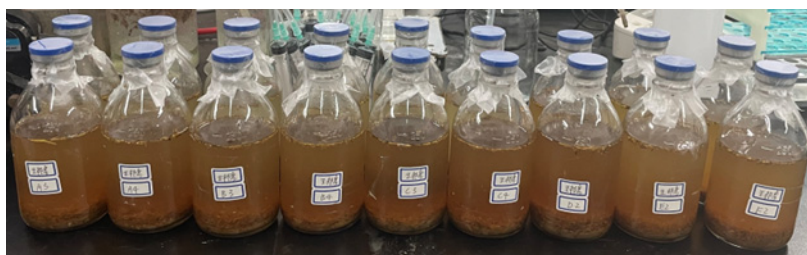

**Figure S1. The experimental reactors.**

## References

- [1] Zhang B., Li Y., Fei Y., Cheng Y. Novel pathway for vanadium (V) bio-detoxification by gram-positive *Lactococcus raffinolactis*. *Environmental Science & Technology*, 2021, 55(3): 2121-2131.
- [2] Wang G, Zhang B, Li S, Yang M., Yin C. Simultaneous microbial reduction of vanadium (V) and chromium (VI) by *Shewanella loihica* PV-4. *Bioresource Technology*, 2017, 227: 353-358.
- [3] Shi C., Cui Y., Lu J., Zhang B. Sulfur-based autotrophic biosystem for efficient vanadium (V) and chromium (VI) reductions in groundwater. *Chemical Engineering Journal*, 2020, 395: 124972.
- [4] Ali M.M.S., Imam D.M., El-Nadi Y.A. Vanadium (V) removal and recovery by adsorption onto modified activated carbon derived from natural hydroxyapatite. *Journal of the Iranian Chemical Society*, 2021, 18(10): 2771-2784.
- [5] He Q., Si S., Zhao J., Yan H., Sun B., Cai Q., Yu Y. Removal of vanadium from vanadium-containing wastewater by amino modified municipal sludge derived ceramic. *Saudi Journal of Biological Sciences*, 2018, 25(8): 1664-1669.
